# Supplementary material for: Boosting membrane carbon capture via multifaceted polyphenol-mediated soldering
Source: PubMed Central journal article supplement (PMC10043006; doi:10.1038/s41467-023-37479-9), 2023-03-27
Supplement: 41467_2023_37479_MOESM1_ESM.pdf [file 41467_2023_37479_MOESM1_ESM.pdf]

1  
2  
3  
4  
5  
6  
7  
8

## **Supplementary Information**

### **Boosting Membrane Carbon Capture via Multifaceted Polyphenol-mediated Soldering**

Zhu et al.

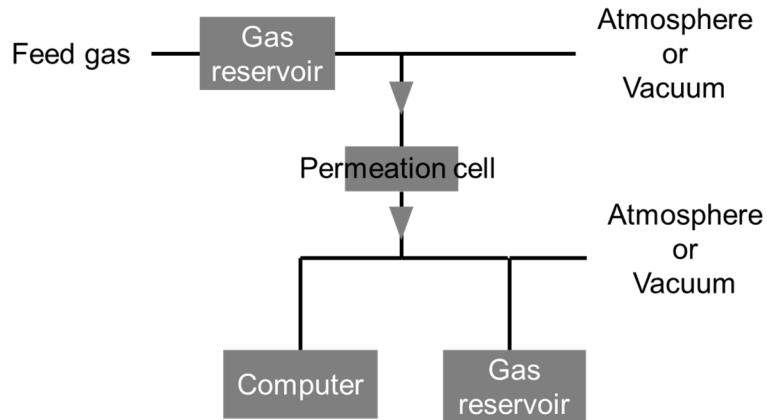

1

2 **Supplementary Figure 1.** Schematic diagram of pure gas permeation test.

3 **Supplementary Note 1:** The pure gas permeation equipment is based on a constant

4 volume -variable pressure method from Suzhou Faith and Hope Membrane Technology

5 Co. Ltd. The feed gas pressure varied from 3.5 to 20 bar and the permeate side kept

6 vacuum. The operating temperature ranged from 35 to 55 °C. The permeation data was

7 obtained from the average of three membrane samples to make sure reproducibility.

8 Pure gas permeability was tested in the sequence H<sub>2</sub>, N<sub>2</sub>, CH<sub>4</sub>, and CO<sub>2</sub>.

9

10

1

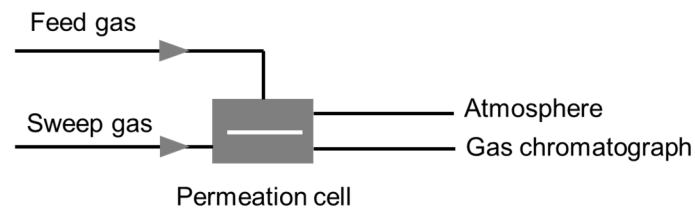

2

3 **Supplementary Figure 2.** Schematic diagram of mixed gas permeation test.

4 **Supplementary Note 2:** Binary gas CO<sub>2</sub>/N<sub>2</sub> (10/90vol%) and CO<sub>2</sub>/CH<sub>4</sub> (50/50vol%)

5 permeation experiments were conducted based on a constant pressure/variable volume

6 method. Helium is sweep gas. The feed pressure was kept at 2 bar and the test

7 temperature was at 35 °C. The flow rates of feed gas and sweep gas were controlled by

8 two mass flowmeters at 100 ml/min and 40 ml/min, respectively. The flow rate of

9 permeation side was obtained by a flow meter and the composition was determined by

10 a gas chromatograph. Each sample was tested for at last three times.

11

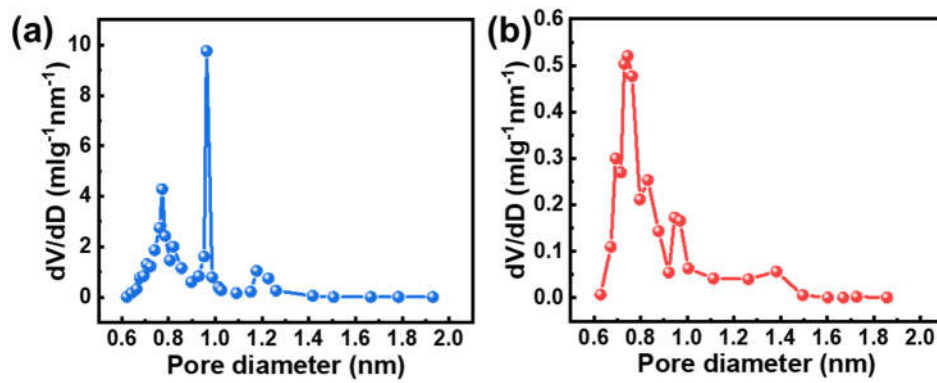

1

2 **Supplementary Figure 3.** Pore size distribution of ZIF-8 (a) and HZIF-8(b) from the  
3 H-K model.

4

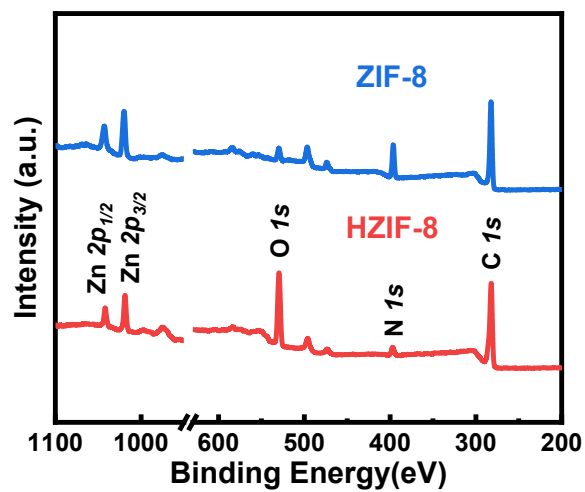

1  
2  
3

**Supplementary Figure 4.** XPS spectra of ZIF-8 and HZIF-8 nanoparticles.

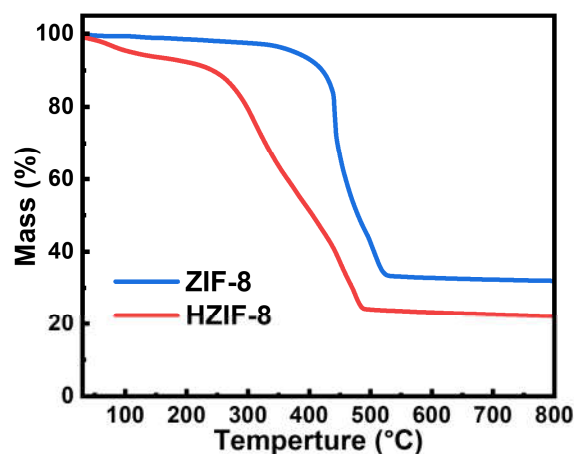

1  
2 **Supplementary Figure 5.** TGA curves of ZIF-8 and HZIF-8 under air atmosphere.

3 **Supplementary Note 3:** The TA loading is evaluated by thermo gravimetric analysis  
4 in air. After 800 °C treatment, the remaining material is completely converted to zinc  
5 oxide. So the TA mass ratio in HZIF-8 ( $\alpha$ ) can be calculated according to following  
6 equal.

7

$$\alpha = 1 - \frac{R_{HZIF-8}}{R_{ZIF-8}}$$

8 where  $R_{HZIF-8}$  and  $R_{ZIF-8}$  is the residual weight of HZIF-8 and ZIF-8, separately.

9 According to Supplementary Figure 5, the values for  $R_{HZIF-8}$  and  $R_{ZIF-8}$  are  
10 22.1 wt% and 32.1 wt%. So, the TA mass ratio in HZIF-8 is about 30.9 wt%.

11

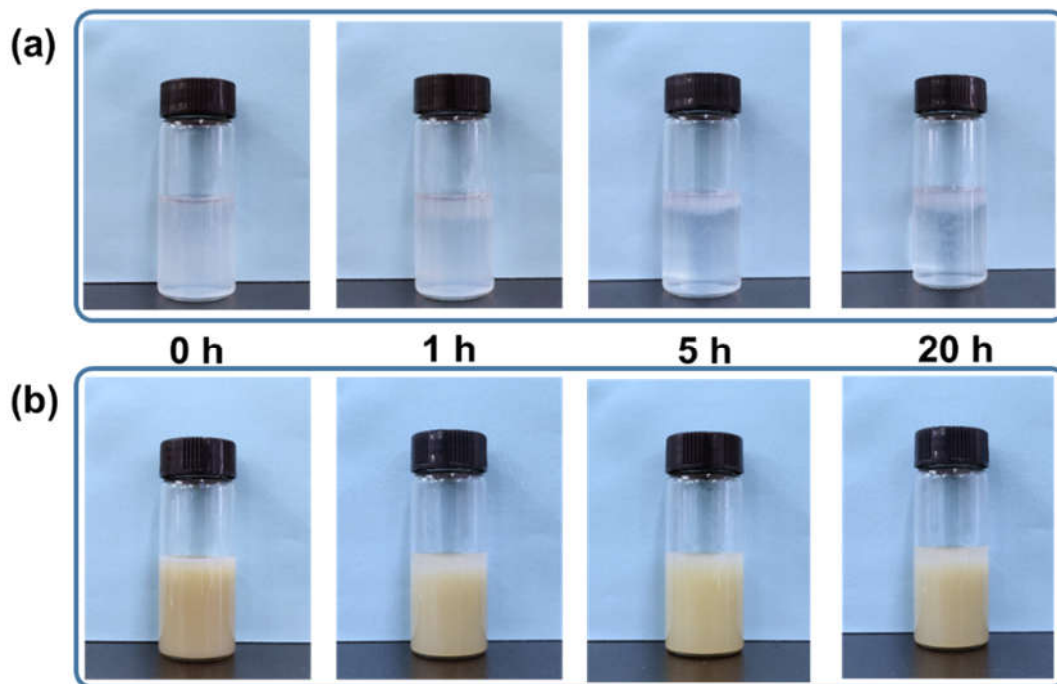

1  
2  
3  
4

**Supplementary Figure 6.** Photographs of ZIF-8 (a) and HZIF-8 (b) with equal volume fraction dispersed in water.

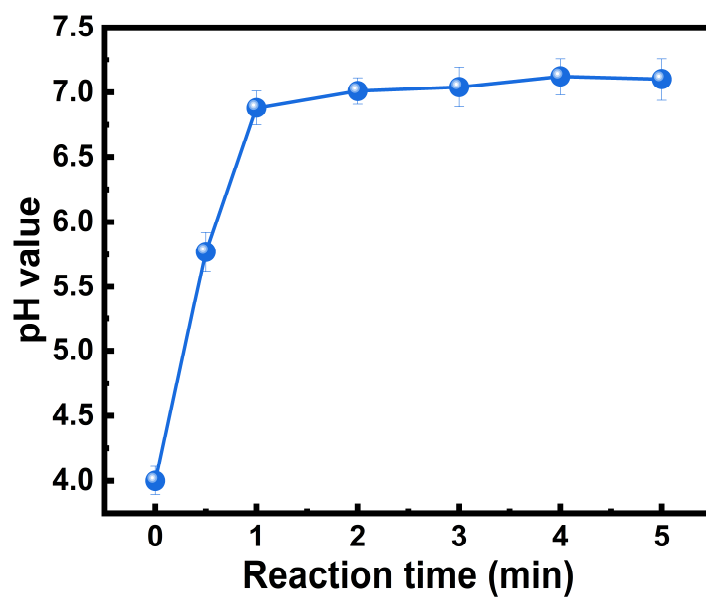

1

2 **Supplementary Figure 7.** pH value of the ZIF-8 particles in TA solution as a function  
3 of time.

4



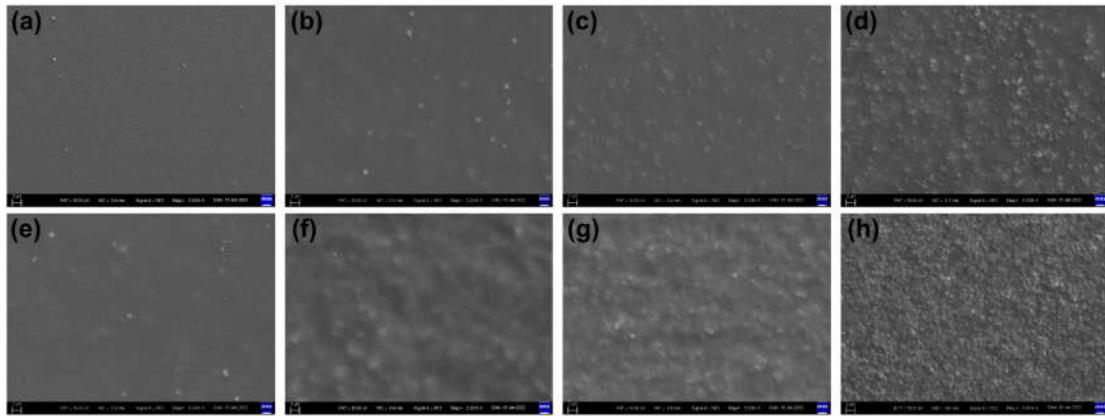

1

2 **Supplementary Figure 8.** Surface SEM images of (a) PIM-1, (b) Z-5-0.5, (c) Z-5-1,  
3 (d) Z-5-3, (e) H-5-0.5, (f) H-5-1, (g) H-5-3, (h) H-5-5

4

1

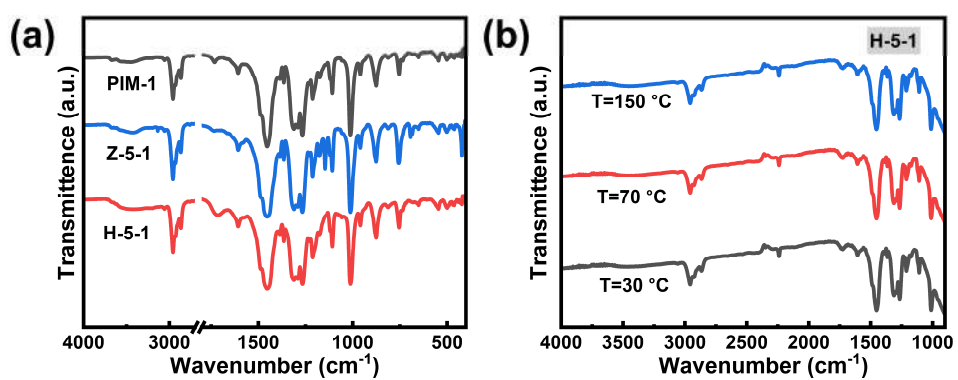

2

3 **Supplementary Figure 9.** (a) FTIR spectra of PIM-1, Z-5-1, and S-5-1 membranes; (b)

4 In situ FT-IR spectra of H-5-1 membranes from 30 °C to 150 °C.

5

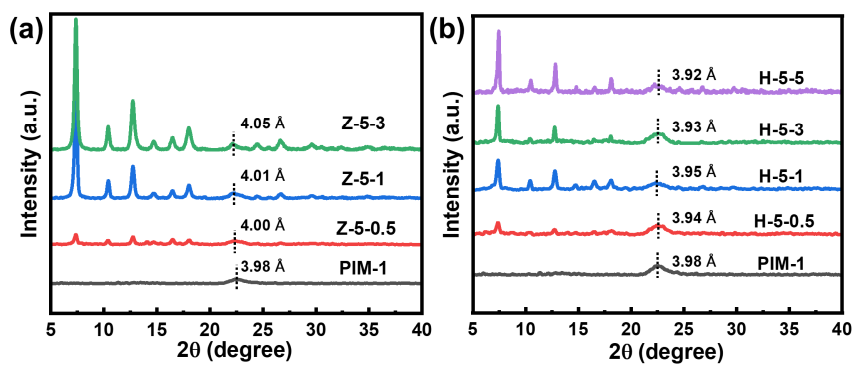

1

2 **Supplementary Figure 10.** XRD spectra of PIM-1/ZIF-8 (a) and PIM-1/HZIF-8 (b)  
3 membranes.

4

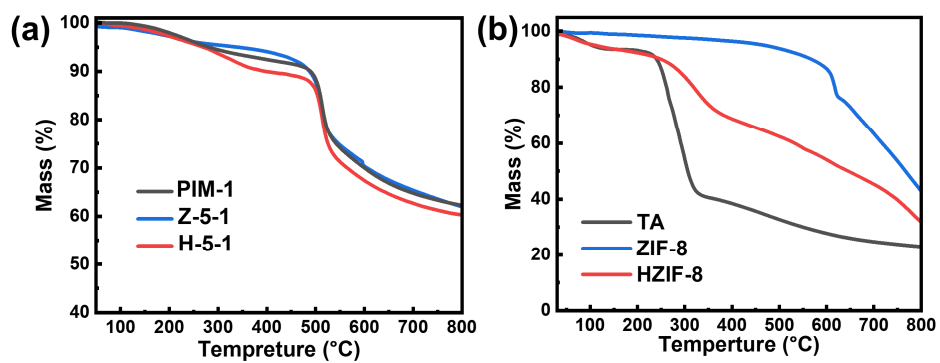

1  
2  
3  
4

**Supplementary Figure 11.** TGA curve of (a) PIM-1, Z-5-1, and H-5-1 and (b) TA, ZIF-8, and HZIF-8 under N<sub>2</sub> atmosphere.

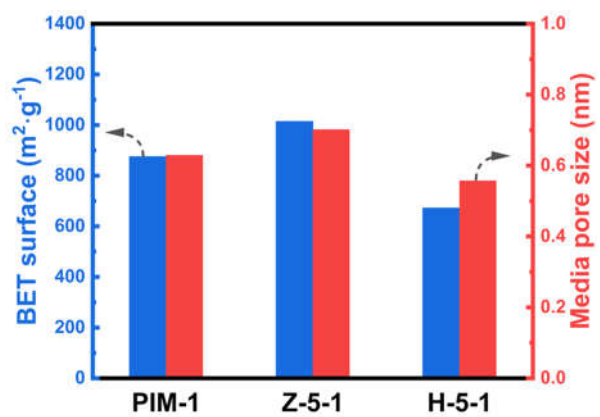

1  
2  
3  
4

**Supplementary Figure 12.** BET surface area and media pore size of PIM-1, Z-5-1, and H-5-1 membranes.

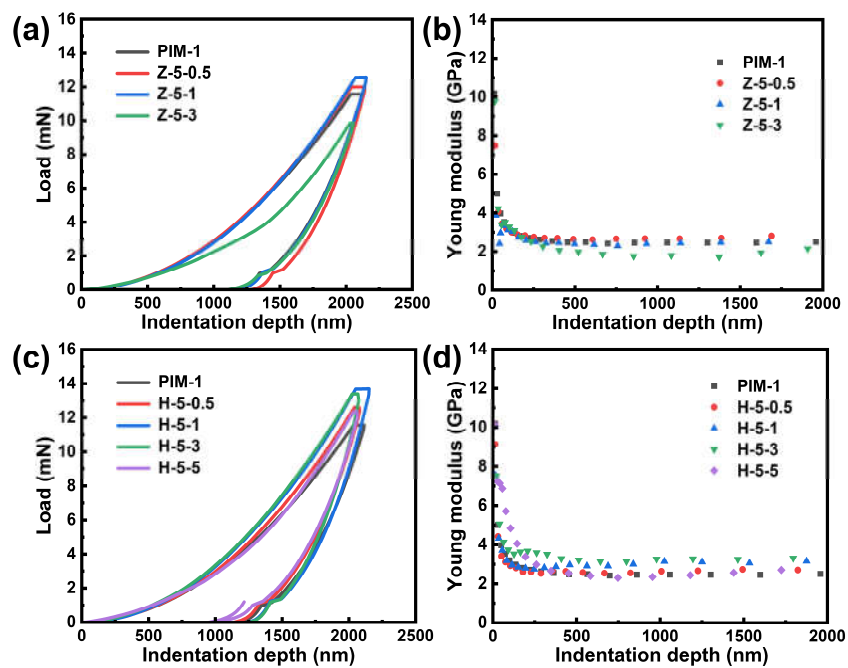

1

2 **Supplementary Figure 13.** Mechanical properties. Load of PIM-1/ZIF-8 (a) and PIM-

3 1/HZIF-8 (c) as a function of indentation depth, Young modulus of PIM-1/ZIF-8 (b)

4 and PIM-1/HZIF-8 (d) as a function of indentation depth.

5

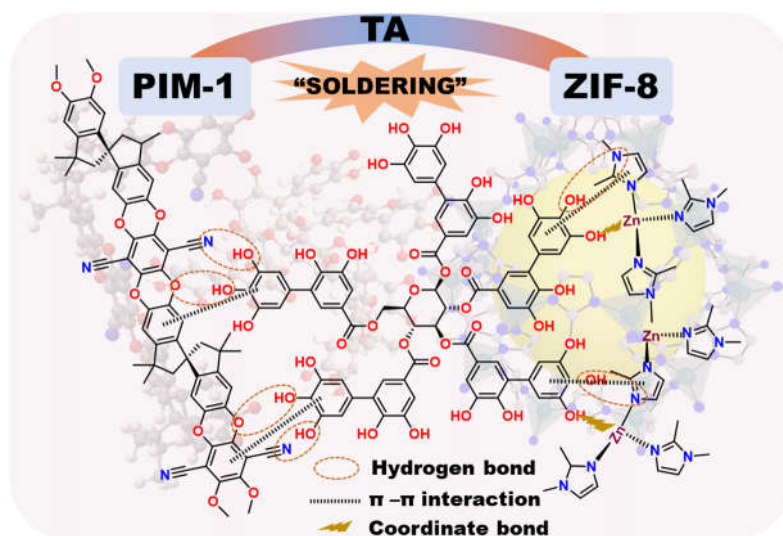

1

2 **Supplementary Figure 14.** Potential adhesions among PIM-1 chains, TA molecules,

3 and ZIF-8.

4

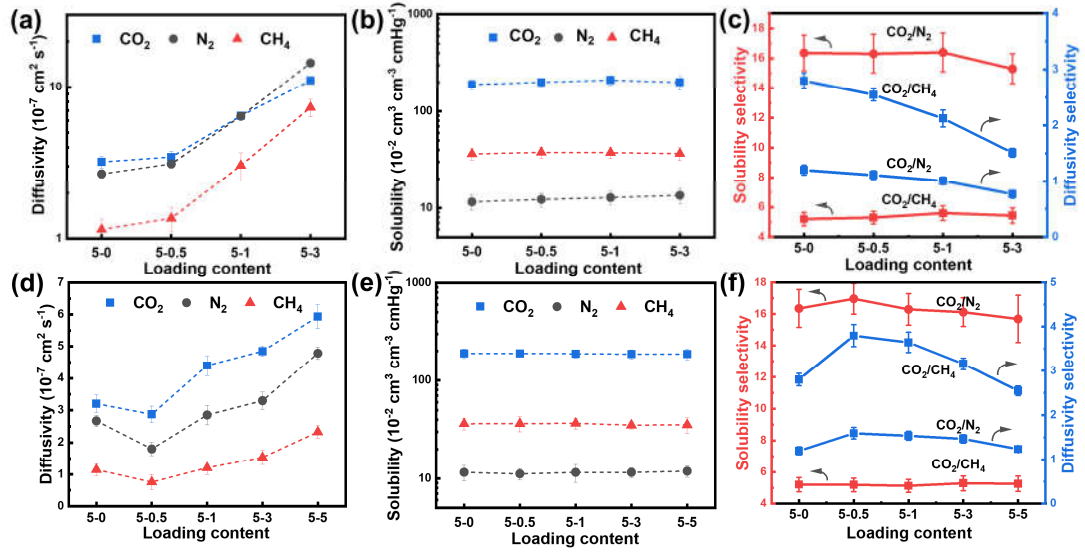

1

2 **Supplementary Figure 15.** Parameter of diffusion coefficients (a), solubility (b), and  
 3 solubility and diffusivity selectivity (c) in PIM-1/ZIF-8 membranes. Parameter of  
 4 diffusion coefficients (d), solubility (e), and solubility and diffusivity selectivity(f) in  
 5 PIM-1/ HZIF-8 membranes. Error bars in all figures represent standard deviation.

6



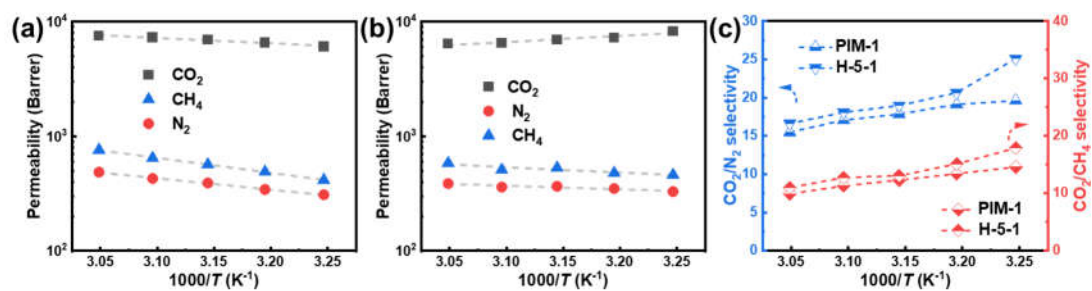

1

2 **Supplementary Figure 16.** Effect of temperature on gas permeability of PIM-1 (a), H-

3 5-1 (b), and gas selectivity (c) at 3.5 bar.

4

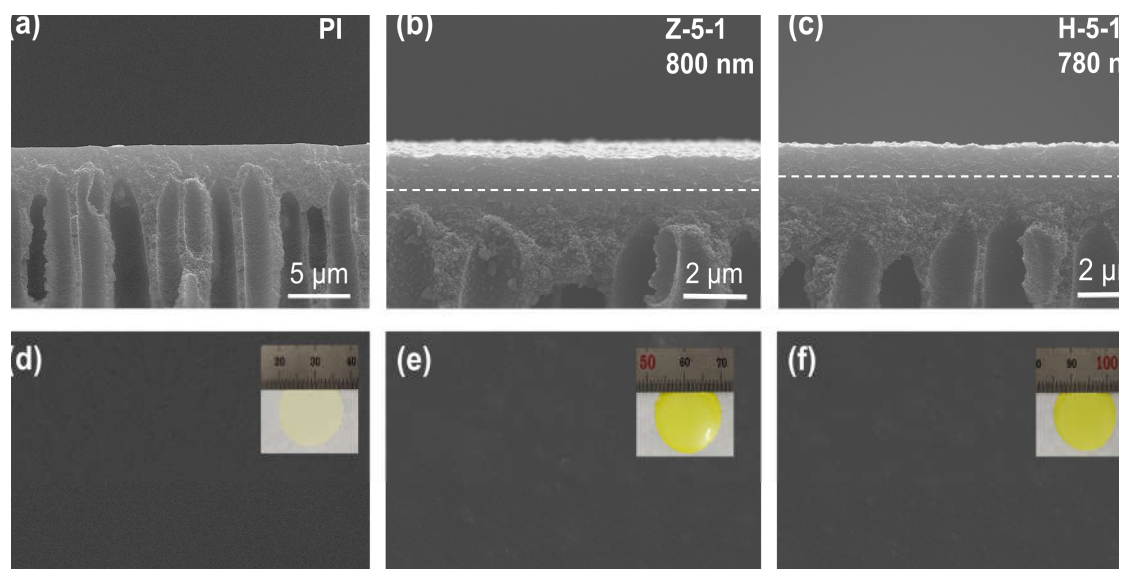

1  
2  
3  
4  
5  
6

**Supplementary Figure 17.** SEM images of thin-film composite membrane. cross-sectional SEM image of (a) PI substrate; (b) Z-5-1; (c) H-5-1. Surface SEM image of (d) PI substrate, (e) Z-5-1; (f) H-5-1. The inserted photos in d,e,f represents the digital pictures of obtained membranes.

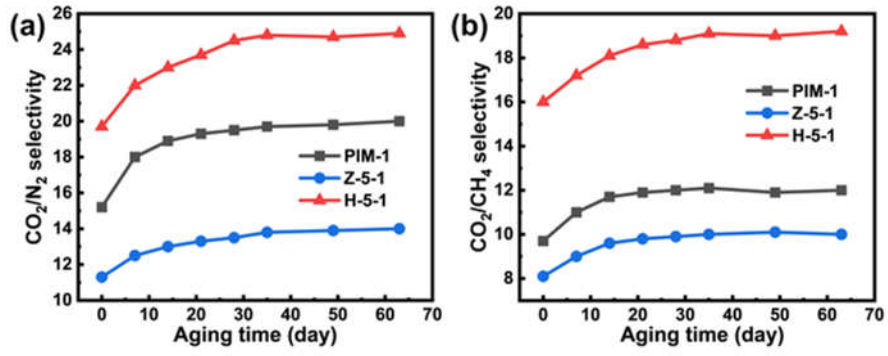

1  
 2 **Supplementary Figure 18.** CO<sub>2</sub>/N<sub>2</sub> (a) and CO<sub>2</sub>/CH<sub>4</sub> (b) selectivity of thin-film  
 3 composite membranes as a function of aging time.  
 4

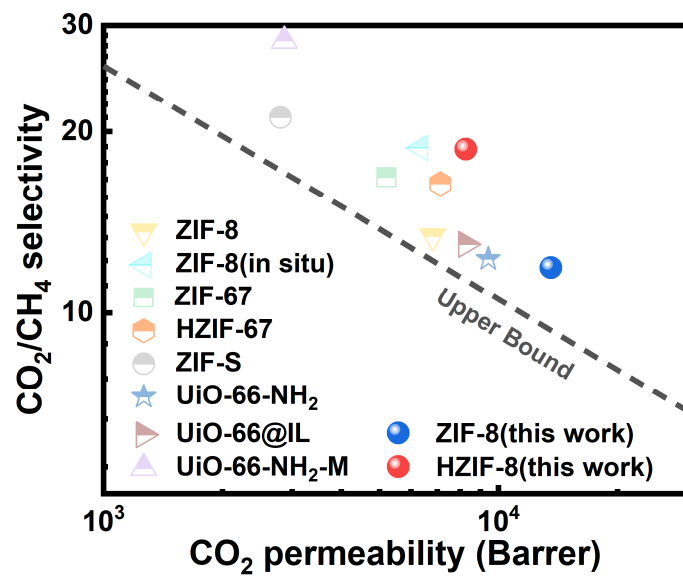

1  
 2 **Supplementary Figure 19.** Comparison of CO<sub>2</sub>/CH<sub>4</sub> separation performance with  
 3 Robeson upper bound.

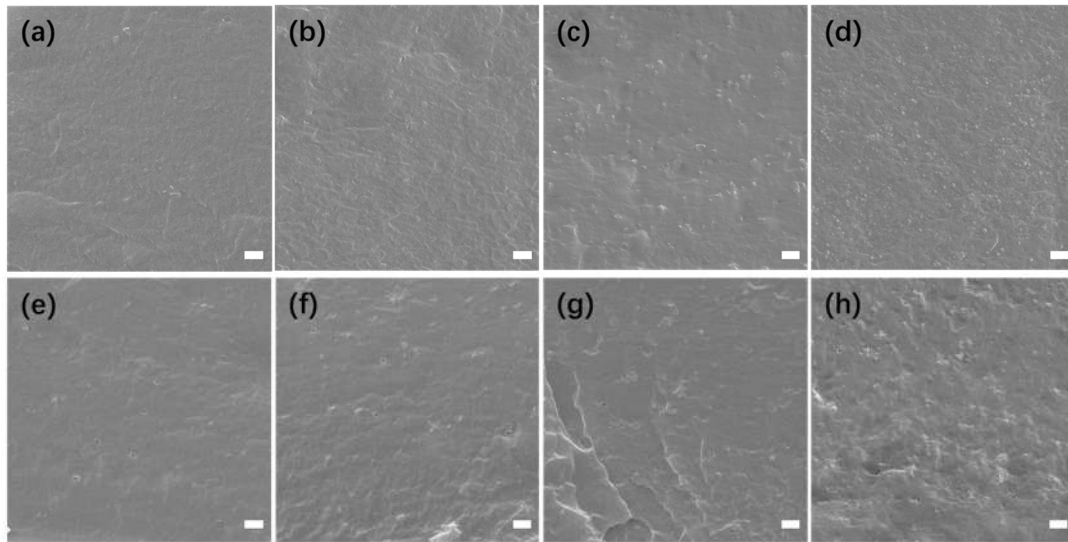

1  
2  
3  
4  
5

**Supplementary Figure 20.** Cross-section of Pebax based mixed matrix membranes. (a-d) ZIF-8 containing membranes with mass ratio 1, 3, 5 and 10%; (e-h) HZIF-8 containing membranes with the same volume fraction with Pebax/ZIF-8 membrane.

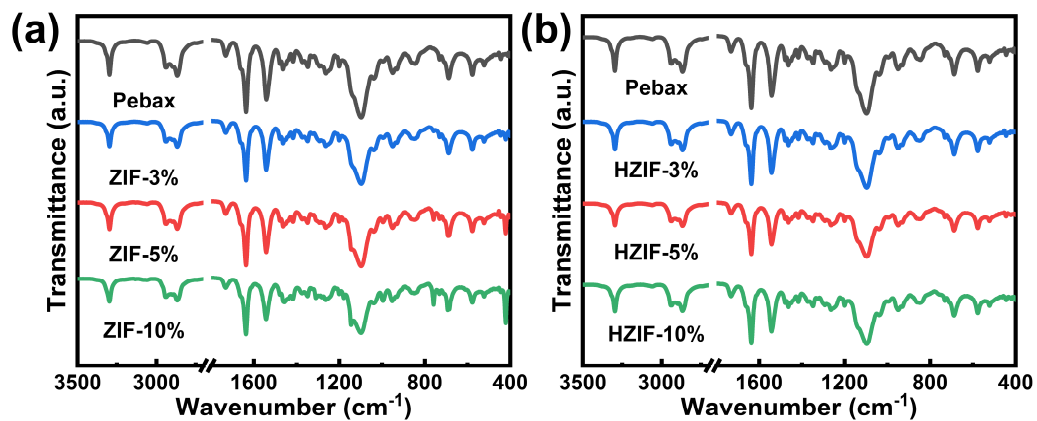

1

2 **Supplementary Figure 21.** ATR-FTIR spectra of Pebax/ZIF-8 (a) and Pebax/HZIF-8

3 (b) membranes

4

5

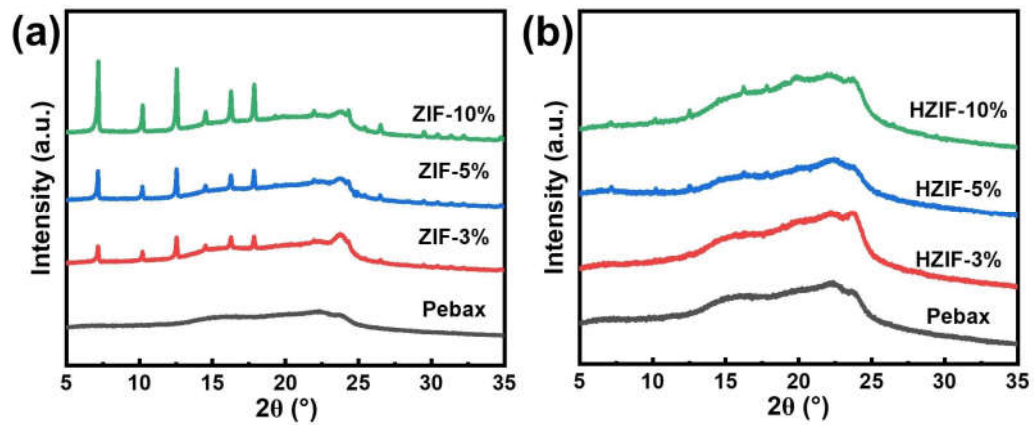

1  
2  
3  
4

**Supplementary Figure 22.** XRD spectra of Pebax/ZIF-8 and Pebax/HZIF-8 membranes.

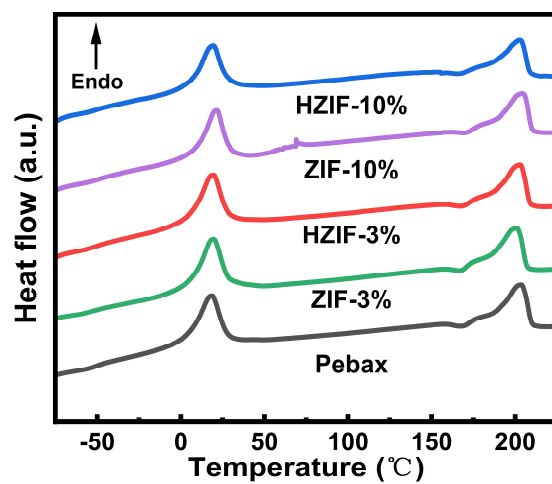

1

2 **Supplementary Figure 23.** DSC curve of Pebax/ZIF-8 and Pebax/HZIF-8 membranes.

3



1

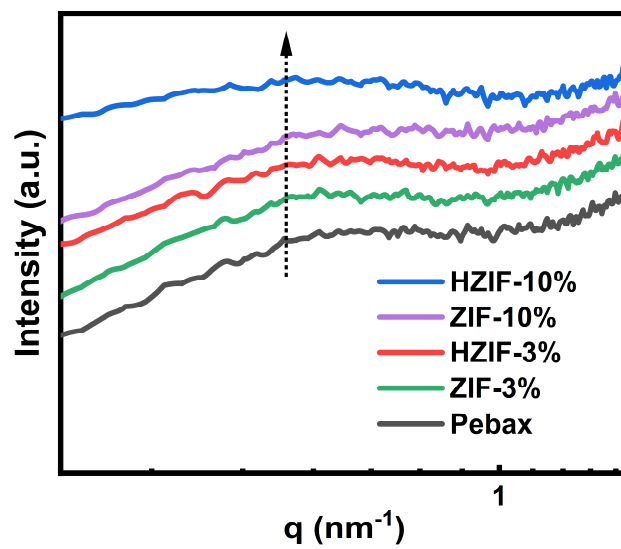

2

3 **Supplementary Figure 24.** SAXS curve of Pebox/ZIF-8 and Pebox/HZIF-8

4 membranes

5

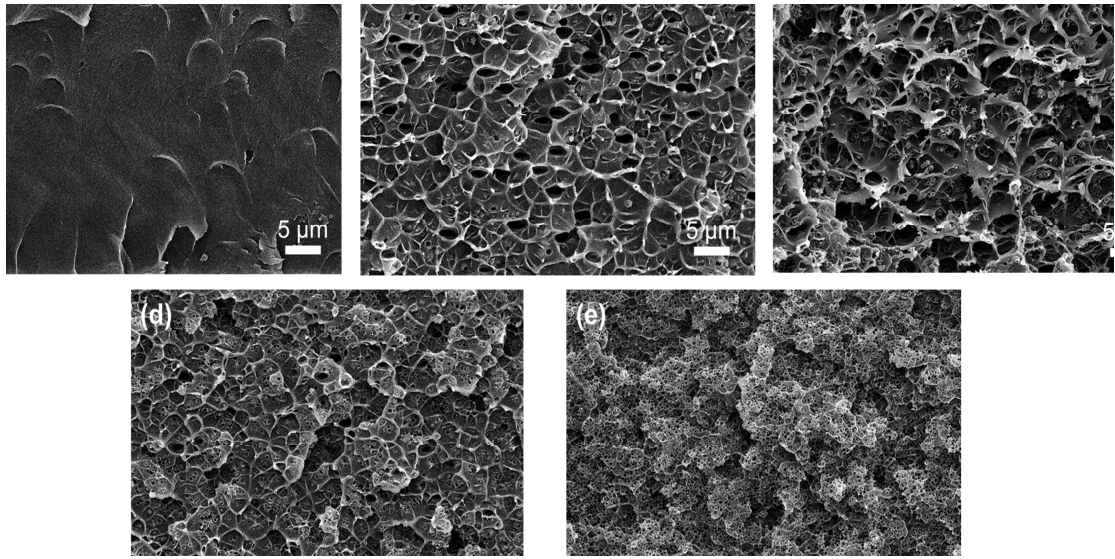

1  
2  
3  
4

**Supplementary Figure 25.** Cross-section SEM images of (a) M-0, (b) M-5, (c) M-10, (d) M-20, and (e) M-30.

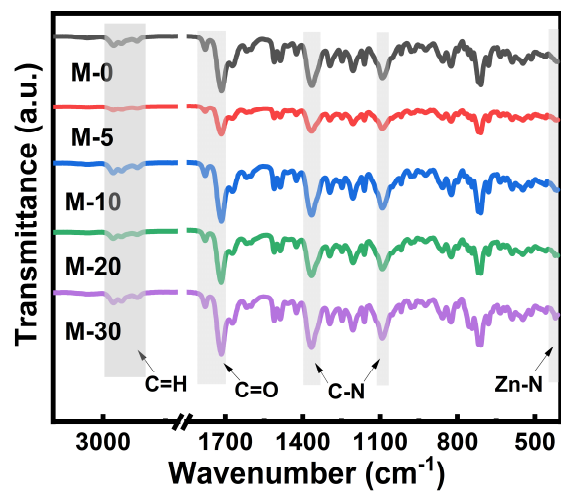

1  
2  
3

**Supplementary Figure 26.** ATR-FTIR spectra of Matrimid/HZIF-8 membranes.

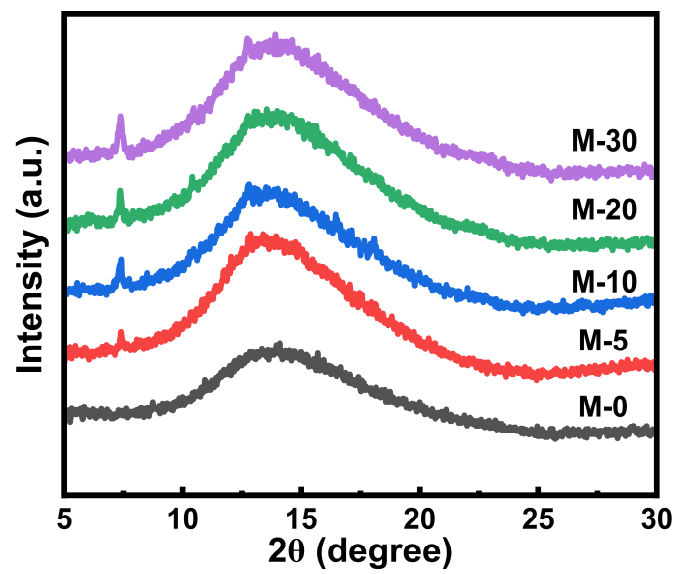

1  
2  
3

Supplementary Figure 27. XRD spectra of Matrimid/HZIF-8 membranes.

1 **Supplementary Table 1.** Specific surface area and pore volume and pore size of ZIF-  
2 8 and HZIF-8 nanoparticles.

---

| Nanoparticle | BET surface area (m <sup>2</sup> /g) | Total pore volume (ml/g) | H-K mode pore size (nm) |
|--------------|--------------------------------------|--------------------------|-------------------------|
| ZIF-8        | 1661.9                               | 0.66                     | 0.96                    |
| HZIF-8       | 265.9                                | 0.23                     | 0.74                    |

---

3

4

1 **Supplementary Table 2.** The detailed chemical compositions from XPS analysis in  
2 ZIF-8 and HZIF-8.

| Sample | Composition |       |       |       |
|--------|-------------|-------|-------|-------|
|        | Zn 2p       | O 1s  | N 1s  | C 1s  |
| ZIF-8  | 3.67        | 5.49  | 15.45 | 75.39 |
| HZIF-8 | 1.68        | 21.71 | 3.62  | 72.99 |

3  
4

1 **Supplementary Table 3.** PALS data of PIM-1, Z-5-1, and H-5-1 membranes.

| Membrane | $\tau_3(\text{ns})$ | $I_3(\%)$ | $r_3(\text{\AA})$ | $\tau_4(\text{ns})$ | $I_4(\%)$  | $r_4(\text{\AA})$ |
|----------|---------------------|-----------|-------------------|---------------------|------------|-------------------|
| PIM-1    | 1.99±0.03           | 7.79±0.13 | 2.84±0.03         | 4.55±0.07           | 9.87±0.15  | 4.52±0.05         |
| Z-5-1    | 2.18±0.02           | 9.84±0.18 | 3.01±0.02         | 4.72±0.08           | 10.17±0.21 | 4.61±0.07         |
| H-5-1    | 1.97±0.03           | 7.94±0.10 | 2.82±0.03         | 4.75±0.07           | 9.91±0.19  | 4.62±0.07         |

2

1 **Supplementary Table 4.** Pure gas permeability and ideal selectivity of PIM-1 MMMs  
 2 at 3.5 bar and 35 °C.

| Loading of MOFs | Permeability (Barrer) |                 |                 | Ideal selectivity               |                                  |
|-----------------|-----------------------|-----------------|-----------------|---------------------------------|----------------------------------|
|                 | N <sub>2</sub>        | CH <sub>4</sub> | CO <sub>2</sub> | CO <sub>2</sub> /N <sub>2</sub> | CO <sub>2</sub> /CH <sub>4</sub> |
| ZIF-8           |                       |                 |                 |                                 |                                  |
| 0(PIM-1)        | 309±15                | 416±20          | 6065±202        | 19.6±1.0                        | 14.6±0.7                         |
| 5-0.5           | 382±12                | 512±19          | 6917±223        | 18.1±1.0                        | 13.5±0.6                         |
| 5-1             | 822±21                | 1141±28         | 13564±347       | 16.5±0.8                        | 11.9±0.6                         |
| 5-3             | 2012±38               | 2687±43         | 22046±831       | 11.0±0.4                        | 8.2±0.4                          |
| HZIF-8          |                       |                 |                 |                                 |                                  |
| 5-0.5           | 201±11                | 276±25          | 5442±149        | 27.1±0.9                        | 19.7±0.6                         |
| 5-1             | 309±13                | 441±19          | 8268±231        | 25.1±1.5                        | 18.7±0.7                         |
| 5-3             | 381±19                | 635±28          | 9024±237        | 23.7±1.2                        | 16.7±1.0                         |
| 5-5             | 568±14                | 1059±30         | 11057±305       | 19.5±1.1                        | 13.4±0.6                         |

3



1 **Supplementary Table 5.** Mixed-gas separation performance of PIM-1 and 0.1-ZIF-  
 2 8/PIM-1 at 2 bar and 35 °C.

| Membrane | Permeability (Barrer) |                 |                              |                              | Selectivity                     |                                  |
|----------|-----------------------|-----------------|------------------------------|------------------------------|---------------------------------|----------------------------------|
|          | N <sub>2</sub>        | CH <sub>4</sub> | CO <sub>2</sub> <sup>a</sup> | CO <sub>2</sub> <sup>b</sup> | CO <sub>2</sub> /N <sub>2</sub> | CO <sub>2</sub> /CH <sub>4</sub> |
| PIM-1    | 284±13                | 385±17          | 4786±164                     | 4635±173                     | 16.1±1.3                        | 12.3±0.9                         |
| H-5-1    | 292±15                | 398±18          | 6495±192                     | 6352±198                     | 21.9±1.5                        | 16.2±1.1                         |

3 <sup>a</sup> obtained from the CO<sub>2</sub>/N<sub>2</sub> mixture

4 <sup>b</sup> obtained from the CO<sub>2</sub>/CH<sub>4</sub> mixture

5

1 **Supplementary Table 6.** Activation energy of permeation ( $E_p$ ) for PIM-1 and H-5-1  
2 membranes.

| Gas             | $E_p$ (kJ/mol) |       |
|-----------------|----------------|-------|
|                 | PIM-1          | H-5-1 |
| CO <sub>2</sub> | 4.00           | -4.45 |
| N <sub>2</sub>  | 10.87          | 3.92  |
| CH <sub>4</sub> | 8.27           | 2.56  |

1 **Supplementary Table 7.** Comparison of the CO<sub>2</sub> permeability and CO<sub>2</sub>/gases  
 2 selectivity of H-5-1 in this work with other reported MOF/PIM-1 MMMs.

| MOF                        | Test conditions | CO <sub>2</sub> enhancement (%) | CO <sub>2</sub> /N <sub>2</sub> selectivity enhancement (%) | CO <sub>2</sub> /CH <sub>4</sub> selectivity enhancement (%) | Reference |
|----------------------------|-----------------|---------------------------------|-------------------------------------------------------------|--------------------------------------------------------------|-----------|
| ZIF-8                      | 20 °C, 1 bar    | 10                              | -20                                                         | -                                                            | 1         |
| ZIF-8 (in situ)            | 35 °C, 3.5 bar  | 64                              | 8.0                                                         | 6.8                                                          | 2         |
| ZIF-67                     | 30 °C, 2 bar    | 15                              | 20                                                          | 34                                                           | 3         |
| MIL-101A                   | 35 °C, 3.5 bar  | 68                              | 1                                                           | 20                                                           | 4         |
| UiO-66                     | 25 °C, 1 bar    | 79                              | 0                                                           | -                                                            | 5         |
| UiO-66-NH <sub>2</sub>     | 35 °C, 1 bar    | 32                              | 7.1                                                         | 1.2                                                          | 6         |
| UiO-66-NH <sub>2</sub> /IL | 20 °C, 1 bar    | 18                              | 5.0                                                         | 51                                                           | 7         |
| UiO-66-NH <sub>2</sub> -M  | 25 °C, 4 bar    | -6.0                            | 71                                                          | 95                                                           | 8         |
| HZIF-8                     | 35 °C, 3.5 bar  | 36                              | 28                                                          | 29                                                           | This work |

3

4

1 **Supplementary Table 8.** Comparison of the CO<sub>2</sub> permeability and CO<sub>2</sub>/gases  
 2 selectivity of MMMs in this work with other reported MMMs

| Polymer | MOF                        | Test condition | CO <sub>2</sub> permeability (Barrer) | CO <sub>2</sub> /N <sub>2</sub> selectivity | CO <sub>2</sub> /CH <sub>4</sub> selectivity | Ref.      |
|---------|----------------------------|----------------|---------------------------------------|---------------------------------------------|----------------------------------------------|-----------|
| PIM-1   | ZIF-8                      | 20 °C, 1 bar   | 6820                                  | 17.9                                        | 13.4                                         | 1         |
| PIM-1   | ZIF-8 (in situ)            | 35 °C, 3.5 bar | 6338                                  | 24.4                                        | 18.8                                         | 2         |
| PIM-1   | ZIF-67                     | 30 °C, 2 bar   | 5206                                  | 24.2                                        | 16.8                                         | 3         |
| PIM-1   | HZIF-67                    | 30 °C, 2 bar   | 7128                                  | 23.0                                        | 16.4                                         | 9         |
| PIM-1   | ZIF-S                      | 30 °C, 2 bar   | 2805                                  | 24                                          | 21.1                                         | 10        |
| PIM-1   | UiO-66-NH <sub>2</sub> -M  | 25 °C, 4 bar   | 2869                                  | 27.5                                        | 28.3                                         | 8         |
| PIM-1   | UiO-66                     | 25 °C, 1 bar   | 13000                                 | 14.1                                        | -                                            | 5         |
| PIM-1   | UiO-66-NH <sub>2</sub>     | 35 °C, 1 bar   | 9420                                  | 15.6                                        | 12.3                                         | 6         |
| PIM-1   | UiO-66-NH <sub>2</sub> /IL | 20 °C, 1 bar   | 8283                                  | 22.5                                        | 12.3                                         | 7         |
| PIM-1   | ZIF-8                      | 35 °C, 3.5 bar | 13564                                 | 16.5                                        | 11.9                                         | This work |
| PIM-1   | HZIF-8                     | 35 °C, 3.5 bar | 8268                                  | 25.1                                        | 18.7                                         | This work |

3 <sup>a</sup> Estimated from gas flux through composite membranes

4 <sup>b</sup> obtained from the mixed gas test

5

1 **Supplementary Table 9.** Pure gas permeability and ideal selectivity of Matrimid-based  
2 MMMs at 3.5 bar and 35 °C.

| Membrane | Permeability (Barrer) |                |                 | Selectivity                     |                                  |
|----------|-----------------------|----------------|-----------------|---------------------------------|----------------------------------|
|          | CO <sub>2</sub>       | N <sub>2</sub> | CH <sub>4</sub> | CO <sub>2</sub> /N <sub>2</sub> | CO <sub>2</sub> /CH <sub>4</sub> |
| M-0      | 8.1±0.4               | 0.28±0.01      | 0.22±0.01       | 29.2±1.2                        | 37.1±1.6                         |
| M-5      | 11.5±0.6              | 0.38±0.01      | 0.28±0.02       | 30.2±1.5                        | 40.9±1.8                         |
| M-10     | 15.3±0.7              | 0.48±0.03      | 0.36±0.02       | 31.6±1.5                        | 42.1±2.1                         |
| M-20     | 18.2±1.0              | 0.59±0.02      | 0.45±0.03       | 30.7±1.6                        | 40.6±1.8                         |
| M-30     | 24.9±0.9              | 0.87±0.04      | 0.71±0.04       | 28.6±1.3                        | 35.3±1.7                         |

3

1 **Supplementary Table 10.** Comparison of separation performance of Matrimid/HZIF-  
 2 8 membranes with other reported Matrimid/ZIF-8 membranes.

| ZIF-8<br>content<br>(wt%) | Test<br>conditions | CO <sub>2</sub><br>enhancement<br>(%) | CO <sub>2</sub> /N <sub>2</sub><br>selectivity<br>enhancement (%) | CO <sub>2</sub> /CH <sub>4</sub><br>selectivity<br>enhancement (%) | Ref.          |
|---------------------------|--------------------|---------------------------------------|-------------------------------------------------------------------|--------------------------------------------------------------------|---------------|
| 20                        | 35 °C, 3.5 bar     | 158                                   | -3.4                                                              | 0                                                                  | <sup>11</sup> |
| 30                        | 35 °C, 3.5 bar     | 315                                   | -37.9                                                             | -25.7                                                              | <sup>11</sup> |
| 40                        | 35 °C, 3.5 bar     | 1023                                  | -65.5                                                             | -65.7                                                              | <sup>11</sup> |
| 10                        | 35 °C, 3.5 bar     | 89                                    | 8.2                                                               | 13.5                                                               | This work     |
| 20                        | 35 °C, 3.5 bar     | 125                                   | 5.1                                                               | 9.4                                                                | This work     |
| 30                        | 35 °C, 3.5 bar     | 207                                   | 1.4                                                               | 3.2                                                                | This work     |

3

4

1 **Supplementary Table 11.** DSC data of Pebax/ZIF-8 and Pebax/HZIF-8 membranes

2

| Sample   | T <sub>g</sub> (°C) | PEO                  |                    | PA6                 |                    |
|----------|---------------------|----------------------|--------------------|---------------------|--------------------|
|          |                     | T <sub>m1</sub> (°C) | X <sub>C</sub> (%) | T <sub>m</sub> (°C) | X <sub>C</sub> (%) |
| Pebax    | -50.9               | 17.9                 | 30.8               | 204.0               | 27.3               |
| ZIF-3%   | -50.5               | 18.3                 | 30.4               | 203.7               | 25.7               |
| HZIF-3%  | -49.7               | 19.0                 | 27.7               | 203.8               | 24.7               |
| ZIF-10%  | -49.9               | 20.3                 | 26.1               | 203.9               | 24.0               |
| HZIF-10% | -47.6               | 19.3                 | 25.7               | 203.8               | 21.5               |

3

4

1 **Supplementary Table 12.** Gas separation data of Pebax/ZIF-8 and Pebax/HZIF-8  
 2 membranes  
 3

| Membrane | Permeability (Barrer) |                |                 | Selectivity                     |                                  |
|----------|-----------------------|----------------|-----------------|---------------------------------|----------------------------------|
|          | CO <sub>2</sub>       | N <sub>2</sub> | CH <sub>4</sub> | CO <sub>2</sub> /N <sub>2</sub> | CO <sub>2</sub> /CH <sub>4</sub> |
| Pebax    | 115.2±3.1             | 2.4±0.1        | 7.5±0.4         | 48.6±1.5                        | 15.4±1.0                         |
| ZIF-1%   | 127.7±4.1             | 2.6±0.1        | 7.7±0.5         | 49.3±2.0                        | 16.6±1.2                         |
| ZIF-3%   | 153.0±5.7             | 3.2±0.2        | 9.4±0.7         | 48.4±1.9                        | 16.3±1.3                         |
| ZIF-5%   | 169.5±5.5             | 3.6±0.1        | 10.5±0.7        | 47.0±1.5                        | 16.1±1.1                         |
| ZIF-10%  | 177.2±6.0             | 4.5±0.3        | 12.2±0.8        | 39.2±1.3                        | 14.6±0.9                         |
| HZIF-1%  | 147.5±4.5             | 2.7±0.2        | 7.3±0.5         | 54.2±2.5                        | 20.1±1.6                         |
| HZIF-3%  | 197.4±6.1             | 3.0±0.3        | 7.4±0.3         | 64.9±2.3                        | 26.7±1.8                         |
| HZIF-5%  | 181.6±5.9             | 2.8±0.1        | 6.7±0.4         | 65.3±2.5                        | 27.3±1.3                         |
| HZIF-10% | 120.5±3.2             | 1.9±0.1        | 4.4±0.2         | 64.7±2.0                        | 27.3±1.1                         |

4



## Supplementary References

1. Bushell A.F., *et al.* Gas permeation parameters of mixed matrix membranes based on the polymer of intrinsic microporosity PIM-1 and the zeolitic imidazolate framework ZIF-8. *J Membr Sci* **427**, 48-62 (2013).
2. He S., *et al.* Symbiosis-inspired de novo synthesis of ultrahigh MOF growth mixed matrix membranes for sustainable carbon capture. *Proc Natl Acad Sci U S A* **119**, e2114964119 (2022).
3. Wu X., *et al.* Nanoporous ZIF-67 embedded polymers of intrinsic microporosity membranes with enhanced gas separation performance. *J Membr Sci* **548**, 309-318 (2018).
4. Khdayyer M., *et al.* Mixed matrix membranes based on MIL-101 metal-organic frameworks in polymer of intrinsic microporosity PIM-1. *Sep Purif Technol* **212**, 545-554 (2019).
5. Prasetya N. & Ladewig B.P. An insight into the effect of azobenzene functionalities studied in UiO-66 frameworks for low energy CO<sub>2</sub> capture and CO<sub>2</sub>/N<sub>2</sub> membrane separation. *J Mater Chem A* **7**, 15164-15172 (2019).
6. Wang Z., *et al.* Polymers of intrinsic microporosity/metal-organic framework hybrid membranes with improved interfacial interaction for high-performance CO<sub>2</sub> separation. *J Mater Chem A* **5**, 10968-10977 (2017).
7. Lu J., *et al.* Preparation of Amino-Functional UiO-66/PIMs Mixed Matrix Membranes with [bmim][Tf<sub>2</sub>N] as Regulator for Enhanced Gas Separation. *Membranes (Basel)* **11**, 35 (2021).
8. Ghalei B., *et al.* Enhanced selectivity in mixed matrix membranes for CO<sub>2</sub> capture through efficient dispersion of amine-functionalized MOF nanoparticles. *Nature Energy* **2**, 17086 (2017).
9. Wu X., *et al.* Accelerating CO<sub>2</sub> capture of highly permeable polymer through incorporating highly selective hollow zeolite imidazolate framework. *AIChE J* **66**, e16800 (2019).
10. Ye C., *et al.* Incorporating nano-sized ZIF-67 to enhance selectivity of polymers of intrinsic microporosity membranes for biogas upgrading. *Chem Eng Sci* **216**, 115497 (2020).
11. Jiang X., *et al.* Aqueous One-Step Modulation for Synthesizing Monodispersed ZIF-8 Nanocrystals for Mixed-Matrix Membrane. *ACS Appl Mater Interfaces* **13**, 11296-11305 (2021).
